1 Title: A Cross-Sectional Analysis of Disparities in Biopsy Result Disclosure for Patients with  
2 Limited English Proficiency

3 Authors: Joseph Dan Khoa Nguyen, BS<sup>1</sup>, Erica Mark, MD<sup>2</sup>, Seth Martin, MD<sup>1</sup>, R. Hal Flowers,  
4 MD<sup>1</sup>

5 Affiliations: 1. University of Virginia, Department of Dermatology, Charlottesville, VA 22903,

6 2. Kaiser Permanente, Department of Internal Medicine, Oakland, CA 94611

7 Author Contributions: J.D.K.N., E.M., S.M., and R.H.F. designed research; J.D.K.N., E.M., and  
8 S.M. performed data collection; J.D.K.N., E.M., and S.M. analyzed data; J.D.K.N., E.M., and  
9 R.H.F. wrote the paper, and J.D.K.N., E.M., S.M., and R.H.F edited the paper.

10 ORCID IDs: Joseph D. K. Nguyen: 0009-0008-1585-7230; Erica Mark: 0000-0002-2578-082X;

11 Seth Martin: 0000-0001-8292-4140

12 Statements and Declarations: The authors have nothing to disclose.

13 Keywords: dermatology, English, interpreter, language, translation

14

15 Corresponding author:

16 Joseph Dan Khoa Nguyen

17 1215 Lee St, Charlottesville, VA 22903

18 [jdn4de@virginia.edu](mailto:jdn4de@virginia.edu)

19 **Abstract:**

20 Patients with limited English proficiency (LEP) receiving care from language-discordant  
21 providers experience worse outcomes in healthcare quality, safety, and satisfaction, so  
22 optimizing medical care for patients with LEP is an integral topic for quality improvement. At  
23 our institution, biopsy results are disclosed via telephone unless discussed during an  
24 appointment. In this retrospective cohort study, we aimed to quantify the relative lag time in  
25 telephone-based biopsy result disclosure when interpretation services were utilized compared to  
26 when they were not. A total of 12,372 patient interactions were analyzed; 250 patients (2.02%)  
27 required interpreters, and most of these patients spoke Spanish (196, 78.4%). Other languages  
28 spoken included Tagalog, Ukrainian, Serbian, Russian, Punjabi, Mandarin, Kurdish, Farsi,  
29 Nepali Arabic, and American Sign Language. The mean delay from provider result release to  
30 disclosure for patients who required an interpreter was 55.0 hours compared to 36.6 hours for  
31 those who did not, respectively ( $p < 0.001$ ). For those requiring a Spanish interpreter, this delay  
32 was 60.2 hours ( $p < 0.001$ ). For non-Spanish interpretation, the delay was 36.6 hours ( $p = 0.99$ ).  
33 Patients requiring a Spanish interpreter experienced increased mean wait times for receiving  
34 biopsy results compared to those who spoke English. Possible reasons include increased  
35 communication burden for clinicians when using interpreters, insufficient provider awareness of  
36 delays, and patient socioeconomic factors. Future research may analyze the impact of delayed  
37 result disclosure, optimal disclosure methods, and initiatives to reduce disparities in time to  
38 result disclosure for LEP patients.

39

40 **Background:**

41 Patients with limited English proficiency (LEP) receiving care from language-discordant  
42 providers are more likely to have worse outcomes in healthcare quality, safety, and satisfaction  
43 compared to LEP patients or those fluent in English receiving care from language-concordant  
44 providers [1-3]. LEP refers to individuals who speak English “less than very well [4].” In 2013,  
45 25.1 million U.S. residents were considered to have LEP [4]. The Joint Commission’s Sentinel  
46 Event Database reveals that communication issues are the most common root cause of serious  
47 patient safety events [5], so optimizing medical care for patients with LEP is an integral topic for  
48 quality improvement.

49 At our academic medical center, biopsy results are generally disclosed via telephone unless  
50 discussed during an appointment. Our institution does have widely used interpretation services  
51 that are offered for all patients, both for in-person visits and telephone calls. In this retrospective  
52 analysis, we aimed to quantify the relative lag time in telephone-based biopsy result disclosure  
53 when interpretation services were utilized compared to when they were not. To the authors’  
54 knowledge, this is the first paper exploring disparities in telephone-based biopsy result disclosure  
55 for patients requiring interpretation services.

56

## 57 **Methods:**

### 58 **Participants:**

59 This study was deemed exempt by the University of Virginia Institutional Review Board. This  
60 study is a retrospective cohort study of patients who received telephone-based biopsy disclosure  
61 at an academic medical center. Inclusion criteria were disclosure of biopsy result by telephone,  
62 disclosure by a physician, and recorded interpretation status.

63 Data Collection:

64 Deidentified patient data from January 2019 - December 2021 were extracted from Epic.

65 Measures:

66 Data collected from Epic included time of finalized biopsy reports, time of biopsy report  
67 finalization, time of patient receiving results, and interpretation utilization.

68 Analysis:

69 Data were exported to R, version 4.0.2. The primary outcome was lag time, defined as the time  
70 from when the biopsy report is finalized to when patients receive the results (through phone call).  
71 Lag time comparisons were made via Wilcoxon Rank Sum tests between patients requiring  
72 interpretation vs no interpretation, and between patients requiring Spanish interpretation vs non-  
73 Spanish interpretation vs no interpretation. In this analysis, all patients who utilized  
74 interpretation services were included, including patients using an American Sign Language  
75 interpreter, to effectively assess the impact of interpretation services on biopsy result disclosure  
76 lag time.

77

78 **Results:**

79 A total of 12,372 patient interactions were analyzed; 250 patients (2.02%) required interpreters,  
80 and most of these patients spoke Spanish (196, 78.4%). Other languages spoken included:  
81 Tagalog (n=1), Ukrainian (n=2), Serbian (n=2), Russian (n=2), Punjabi (n=1), Mandarin (n=5),  
82 Kurdish (n=1), Farsi (n=11), Nepali (n=5), Arabic (n=12), and ASL (n=10). The mean delay  
83 from provider result release to disclosure for patients who required an interpreter was 55.0 hours

84 compared to 36.6 hours for those who did not; median delays in disclosure were 23.0 hours and  
85 17.0 hours, respectively ( $p < 0.001$ ; 95% CI: [-31.4, -9.2]). For those requiring a Spanish  
86 interpreter, the mean delay was 60.2 hours ( $p < 0.001$ ; 95% CI: [-36.7, -10.5]). For non-Spanish  
87 interpretation, the mean delay was 36.6 hours ( $p = 0.989$ , 95% CI: [(-12.8, 12.9)]) (Figure 1).

88

## 89 **Discussion:**

90 Based on this data, our study demonstrated a disparity in callback times for patients requiring a  
91 Spanish interpreter. Patients requiring a Spanish interpreter had average wait times 23.6 hours  
92 (64.4%) longer than those who spoke English or required a non-Spanish interpreter. While  
93 receiving a result roughly one day later is unlikely to significantly alter management decisions,  
94 the consistent pattern of delays in disclosure of results to patients requiring Spanish interpreters  
95 is a notable finding that warrants further investigation. Of note, this delay may lead to delaying  
96 future diagnostic and therapeutic procedures, potentially negatively influencing patient  
97 outcomes.

98 Prompt result disclosure to LEP patients requires increased provider time and interpreter  
99 availability, creating a communication burden for clinicians [6]. Clinicians report lapses in  
100 professional interpretation, communication delays, and feelings of dissatisfaction and  
101 ineffectiveness when utilizing a telephone interpreter [7]. Delays in receiving medical results can  
102 be stressful for patients [7]. Increased provider awareness of the tendency to inadvertently or  
103 advertently delay these call-backs may help them take steps to alleviate the discrepancy in their  
104 own practice. While it is plausible that the logistical barriers in using interpretation services may  
105 contribute to the delay in call-backs, this does not explain why it only affects patients requiring

106 Spanish interpreters. One plausible explanation for this phenomenon is socioeconomic factors,  
107 such as the inability to pay telephone bills or answer calls during work hours, may limit access to  
108 effective and timely telephone-based communication. Additionally, the sample size of patients  
109 requiring non-Spanish interpretation was very small and may not accurately reflect  
110 communication delays in this population. Future studies may be helpful in further characterizing  
111 and defining this disparity.

112 Limitations of this study include: 1) a lack of information on specific diagnoses, as certain  
113 diagnoses (e.g. malignancy) may be prioritized over others, leading to shorter callback times, 2)  
114 data was from a single center, making it difficult to extrapolate findings across multiple clinical  
115 settings, and 3) relatively few patients (~2%) required an interpreter. Future research may  
116 analyze other departments and institutions, the impact of delayed result disclosure, optimal  
117 disclosure methods, and initiatives to ensure timely delivery of results for all patients.

118

### 119 **New Contribution to the Literature:**

120 To the authors' knowledge, this is the first paper exploring disparities in telephone-based biopsy  
121 result disclosure for patients requiring an interpreter. This paper illuminates a disparity in  
122 callback times for patients requiring a Spanish interpreter, which warrants further investigation.

123

### 124 **References:**

- 125 1. Hilfinger Messias DK, McDowell L, Estrada RD. Language interpreting as social justice  
126 work: perspectives of formal and informal healthcare interpreters. *ANS Adv Nurs Sci.*  
127 2009;32(2):128-43. <https://doi.org/10.1097/ANS.0b013e3181a3af97>. [PMID: 19461230]
- 128 2. Bischoff A, Denhaerynck K. What do language barriers cost? An exploratory study among  
129 asylum seekers in Switzerland. *BMC Health Serv Res.* 2010;10:248. [https://doi.org/](https://doi.org/10.1186/1472-6963-10-248)  
130 [10.1186/1472-6963-10-248](https://doi.org/10.1186/1472-6963-10-248). [PMID: 20731818]
- 131 3. Floyd A, Sakellariou D. Healthcare access for refugee women with limited literacy: layers of  
132 disadvantage. *Int J Equity Health.* 2017;16:195. <https://doi.org/10.1186/s12939-017-0694-8>.  
133 [PMID: 29126420]
- 134 4. Zong J, Batalova J. The Limited English Proficient Population in the United States in 2013.  
135 2015. [https://www.migrationpolicy.org/article/limited-english-proficient-population-united-](https://www.migrationpolicy.org/article/limited-english-proficient-population-united-states-2013)  
136 [states-2013](https://www.migrationpolicy.org/article/limited-english-proficient-population-united-states-2013). Accessed on March 8, 2022.
- 137 5. Dingley C, Daugherty K, Derieg MK, Persing R. Improving Patient Safety Through Provider  
138 Communication Strategy Enhancements. In: *Advances in Patient Safety: New Directions and*  
139 *Alternative Approaches (Vol. 3: Performance and Tools)*. Henriksen K, Battles JB, Keyes MA,  
140 Grady ML, editors. Agency for Healthcare Research and Quality; 2008;  
141 <https://www.ncbi.nlm.nih.gov/books/NBK43663/>.
- 142 6. Völkel G, Fürstberger A, Schwab JD, et al. Patient Empowerment During the COVID-19  
143 Pandemic by Ensuring Safe and Fast Communication of Test Results: Implementation and  
144 Performance of a Tracking System. *J Med Internet Res.* 2021;23:e27348;  
145 <https://doi.org/10.2196/27348>. [PMID: 33999836]

146 7. Gutman CK, Klein EJ, Follmer K, et al. Deficiencies in Provider-Reported Interpreter Use in a  
147 Clinical Trial Comparing Telephonic and Video Interpretation in a Pediatric Emergency  
148 Department. *Jt Comm J Qual Patient Saf.* 2020;46:573-580;  
149 <https://doi.org/10.1016/j.jcjq.2020.08.001>. [PMID: 32888814]

150

151 **Figure 1:** Median and interquartile ranges (IQRs) of lapsed time from provider result release to  
152 patient biopsy report disclosure across patients requiring no interpreter, any interpreter, Spanish  
153 interpreter, or non-Spanish interpreter.



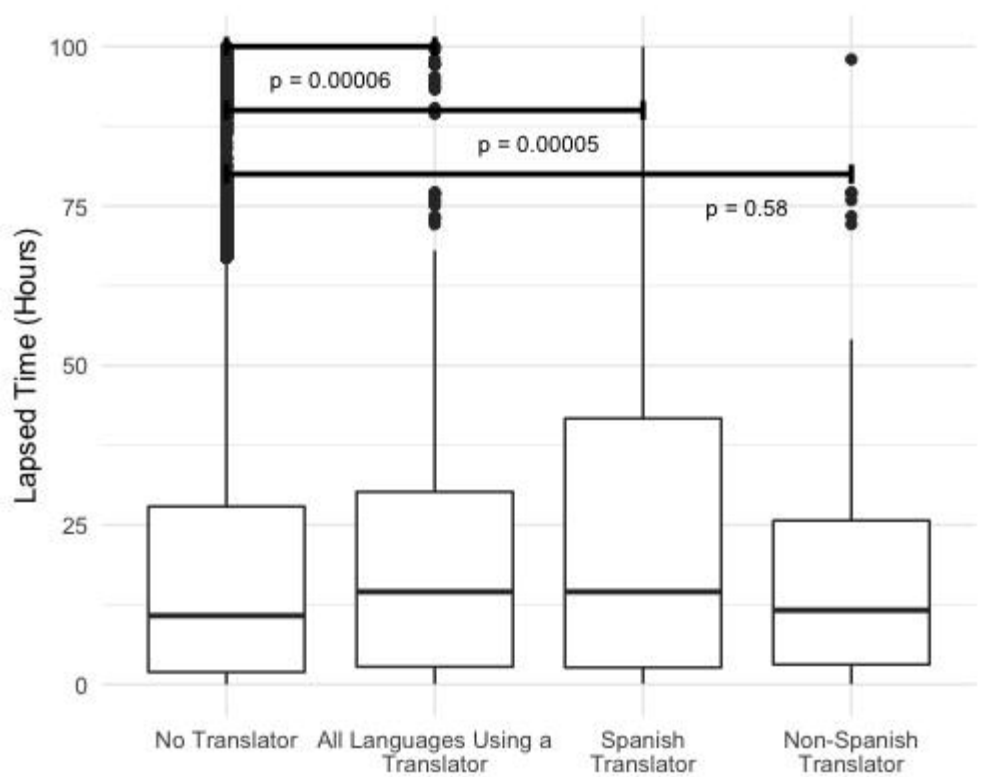

Comparisons made with Wilcoxon tests
